# Supplementary material for: Vinorelbine Improves the Efficacy of Sorafenib against Hepatocellular Carcinoma: A Promising Therapeutic Approach
Source: MDPI journal article supplement (doi:10.3390/ijms25031563), 2024-01-26
Supplement: s1 [file s1]

# Supplementary Materials

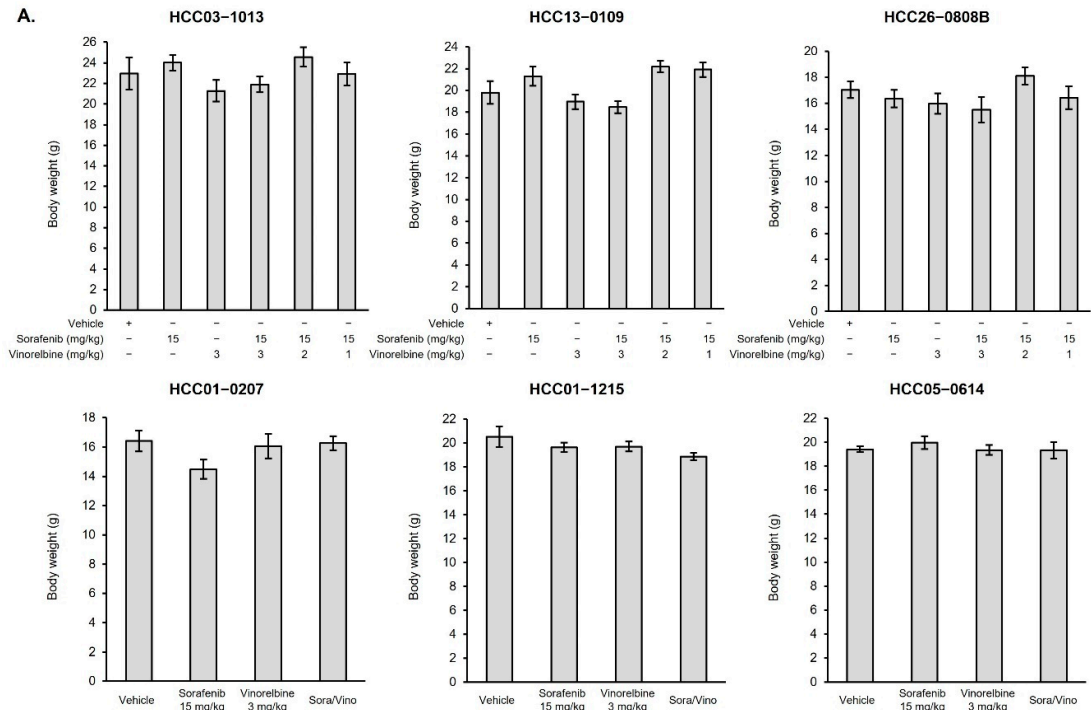

**Supplementary Figure S1A.** Effects of sorafenib, vinorelbine, and Sora/Vino on the body weights of HCC PDX models. Mice bearing the indicated HCC tumors were treated with the vehicle, sorafenib, vinorelbine, or Sora/Vino, as indicated. The body weight of the treated mice was measured, and the mean body weight  $\pm$  SEs at the time of sacrifice were presented.

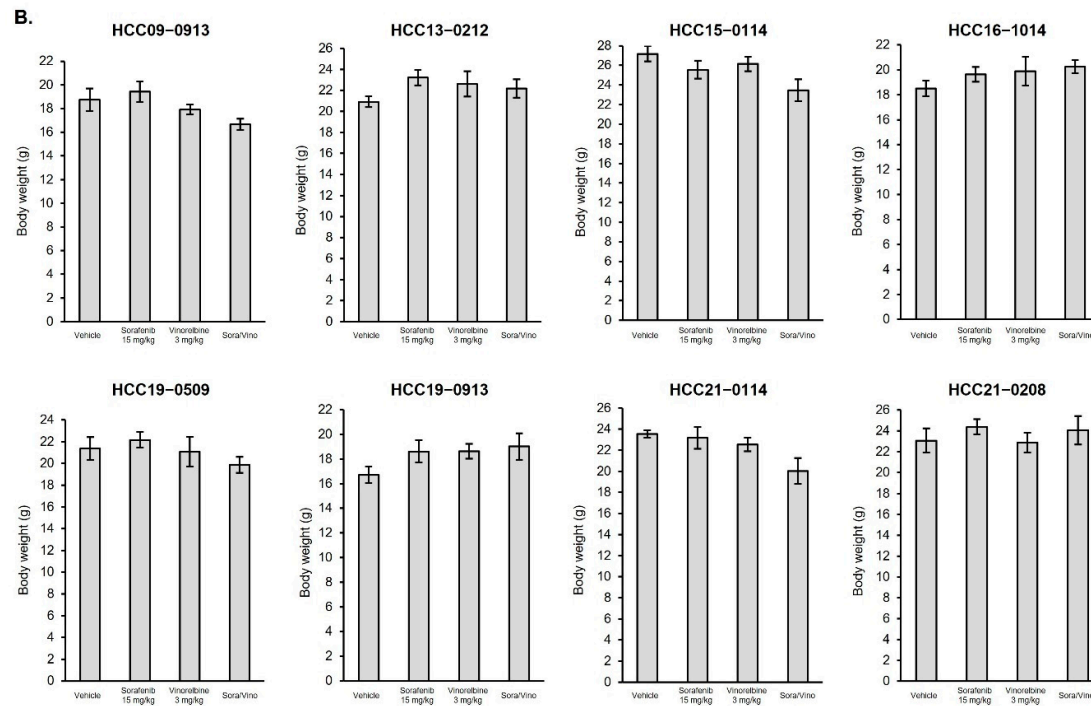

**Supplementary Figure S1B.** Effects of sorafenib, vinorelbine, and Sora/Vino on the body weights of HCC PDX models. Mice bearing the indicated HCC tumors were treated with the vehicle, sorafenib, vinorelbine, or Sora/Vino,

as indicated. The body weight of the treated mice was measured, and the mean body weight  $\pm$  SEs at the time of sacrifice were presented.

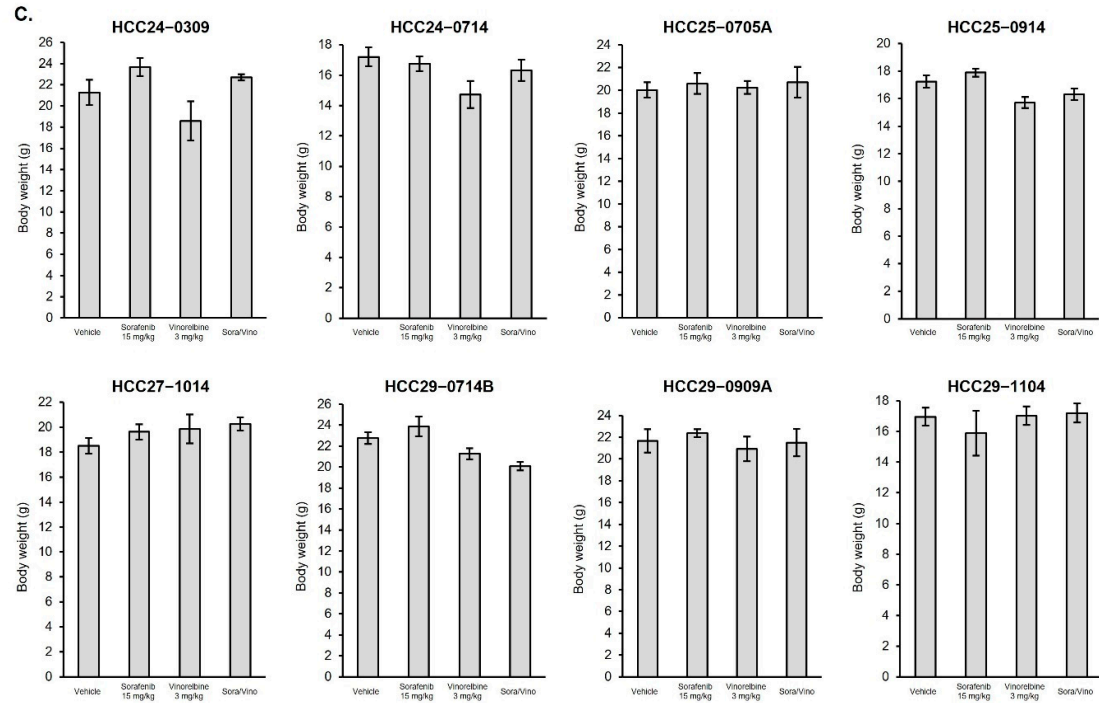

**Supplementary Figure S1C.** Effects of sorafenib, vinorelbine, and Sora/Vino on the body weights of HCC PDX models. Mice bearing the indicated HCC tumors were treated with the vehicle, sorafenib, vinorelbine, or Sora/Vino, as indicated. The body weight of the treated mice was measured, and the mean body weight  $\pm$  SEs at the time of sacrifice were presented.

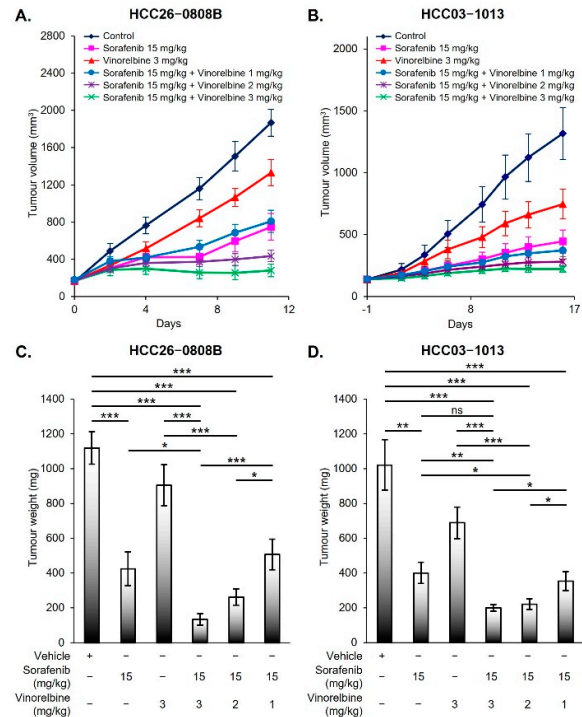

**Supplementary Figure S2.** Dose-dependent effects of vinorelbine and Sora/Vino in the HCC26-0808B and HCC03-1013 PDX models. Mice bearing the indicated tumors were treated with the vehicle plus PBS, sorafenib,

vinorelbine, or Sora/Vino, as indicated. (A, B) The mean tumor volumes  $\pm$  SEs; and (C, D) the mean corresponding tumor weights  $\pm$  SEs at sacrifice are shown (\*  $p < 0.05$ ; \*\*  $p < 0.01$ ; \*\*\*  $p < 0.001$ ; ns, no significance; ANOVA followed by Tukey's test).

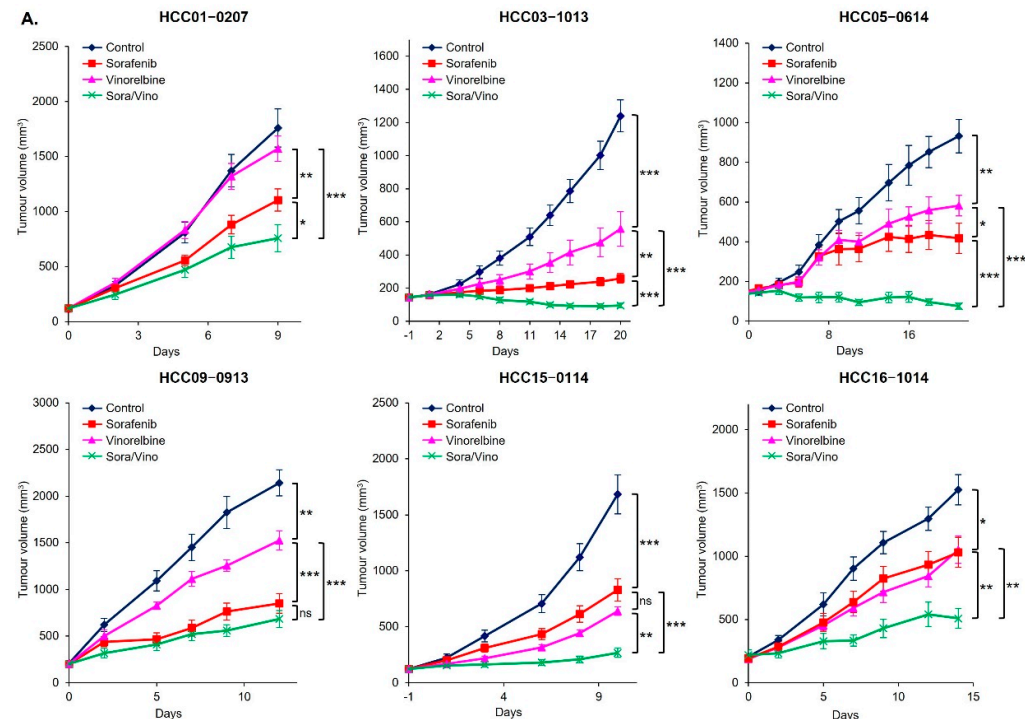

**Supplementary Figure S3A.** Enhanced antitumor effects of the combination of vinorelbine with sorafenib. Mice bearing HCC tumors were treated with the vehicle, sorafenib, vinorelbine, and Sora/Vino over a specific treatment period, as described in Section 4. The mean tumor volumes  $\pm$  SEs are plotted (\*  $p < 0.05$ ; \*\*  $p < 0.01$ ; \*\*\*  $p < 0.001$ ; ns, no significance; ANOVA followed by Tukey's test). Notably, Sora/Vino demonstrated a significant reduction in tumor growth compared to the vehicle or monotherapy groups.

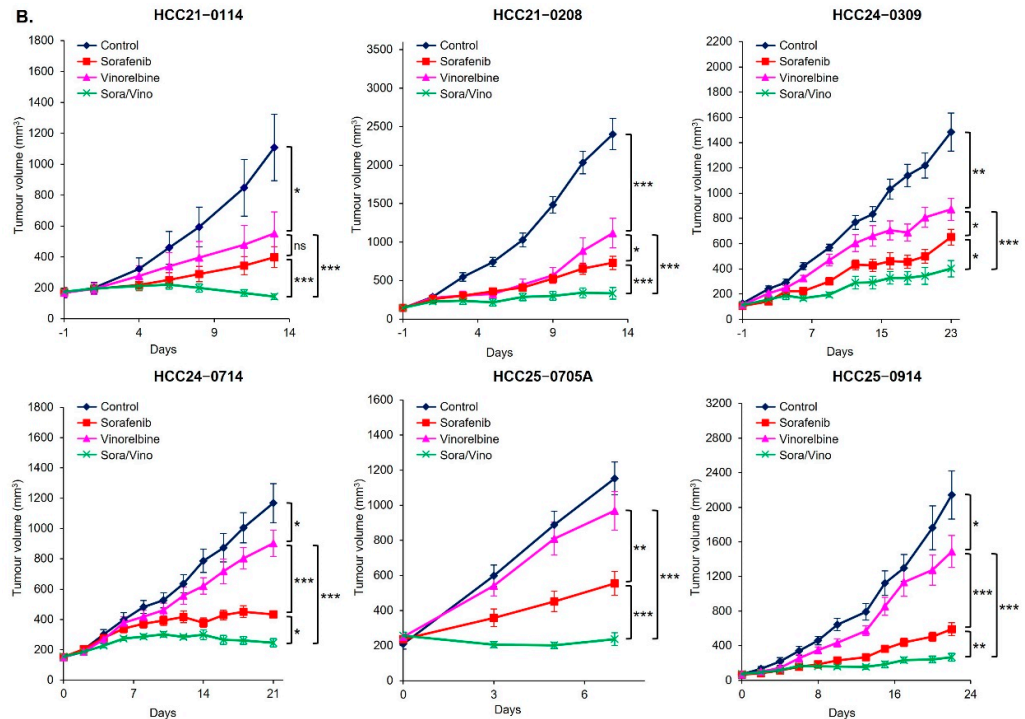

**Supplementary Figure S3B.** Enhanced antitumor effects of the combination of vinorelbine with sorafenib. Mice bearing HCC tumors were treated with the vehicle, sorafenib, vinorelbine, or Sora/Vino over a specific treatment period, as described in Section 4. The mean tumor volumes  $\pm$  SEs are plotted (\*  $p < 0.05$ ; \*\*  $p < 0.01$ ; \*\*\*  $p < 0.001$ ; ns, no significance; ANOVA followed by Tukey's test). Notably, Sora/Vino demonstrated a significant reduction in tumor growth compared to the vehicle or monotherapy groups.

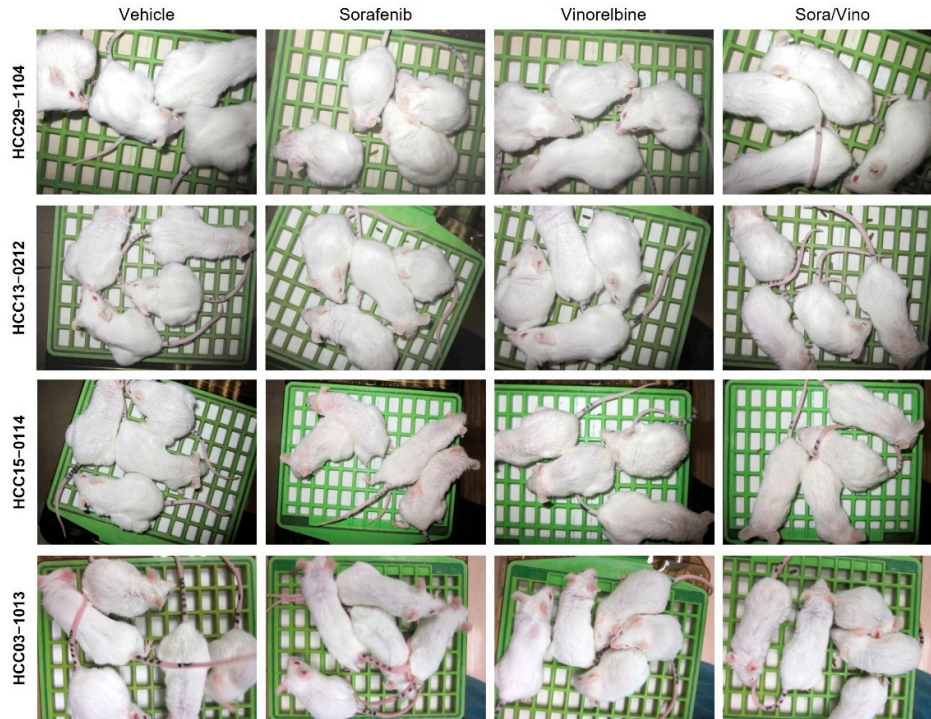

**Supplementary Figure S4.** Minimal drug toxicity and side effects of Sora/Vino in HCC PDX models. Representative photographs of the HCC PDX models treated with the vehicle, sorafenib, vinorelbine, or Sora/Vino revealed that all experimental mice displayed a healthy coat, normal food and water intake, typical social interactions and activity levels, and no signs of aggression among cage mates. Their active movement suggests that the administered dosage, drug toxicity, and side effects posed minimal risks to the treated mice.

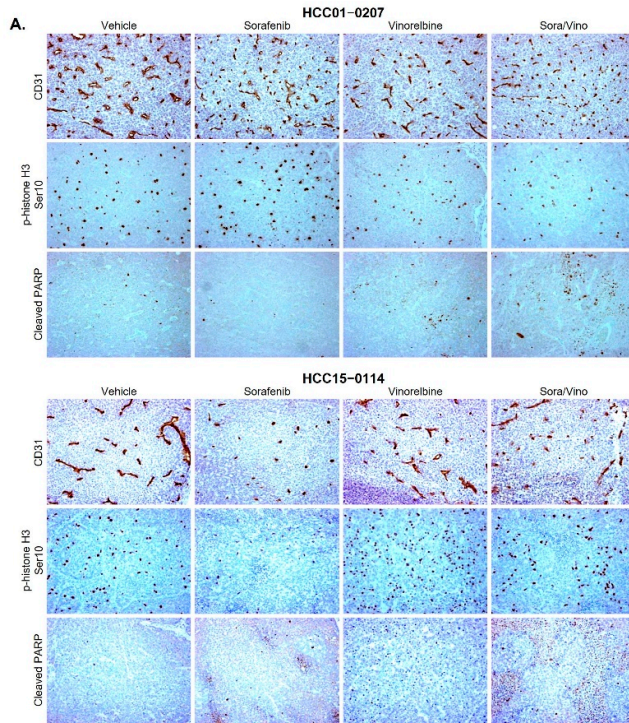

**Supplementary Figure S5A.** Sora/Vino treatment inhibited angiogenesis and induced apoptosis in the HCC01-0207 and HCC15-0114 PDX models. Mice bearing the indicated tumors were randomly divided into four groups and treated with the vehicle, sorafenib, vinorelbine, or Sora/Vino. Harvested tumors were processed for IHC, as described in Section 4. Representative images of tumor sections from vehicle- and drug-treated mice stained for CD31 (blood vessels), p-histone H3 Ser10, and cleaved PARP are shown. Sorafenib treatment reduced the number and size of blood vessels, vinorelbine treatment led to a significant increase in p-histone H3 Ser10-positive cells, and Sora/Vino treatment resulted in a significant increase in cleaved PARP-positive cells. Tumor necrosis was also observed in the stained sections of the HCC PDX models.

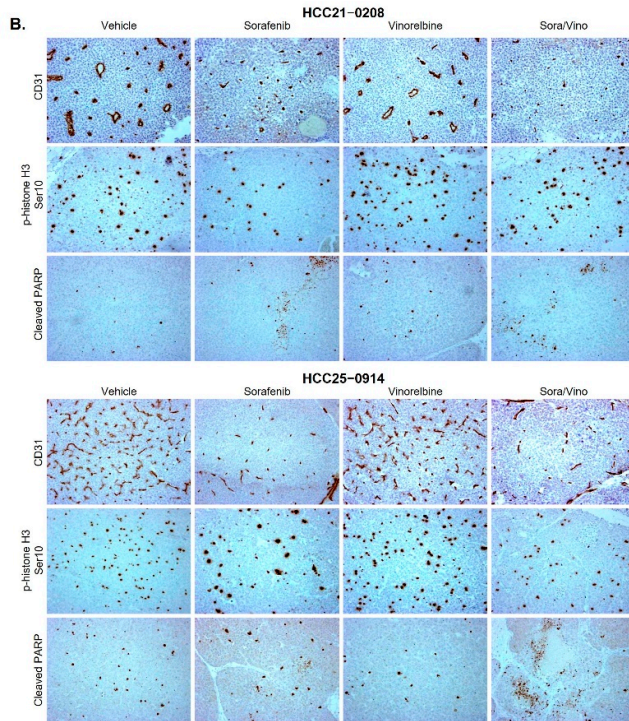

**Supplementary Figure S5B.** Sora/Vino treatment inhibited angiogenesis and induced apoptosis in the HCC21-0208 and HCC25-0914 PDX models. Mice bearing the indicated tumors were randomly divided into four groups and treated with the vehicle, sorafenib, vinorelbine, or Sora/Vino. Harvested tumors were processed for IHC, as described in Section 4. Representative images of tumor sections from vehicle- and drug-treated mice stained for CD31 (blood vessels), p-histone H3 Ser10, and cleaved PARP are shown. Sorafenib treatment reduced the number and size of blood vessels, vinorelbine treatment led to a significant increase in p-histone H3 Ser10-positive cells, and Sora/Vino treatment resulted in a significant increase in cleaved PARP-positive cells. Tumor necrosis was also observed in the stained sections of the HCC PDX models.

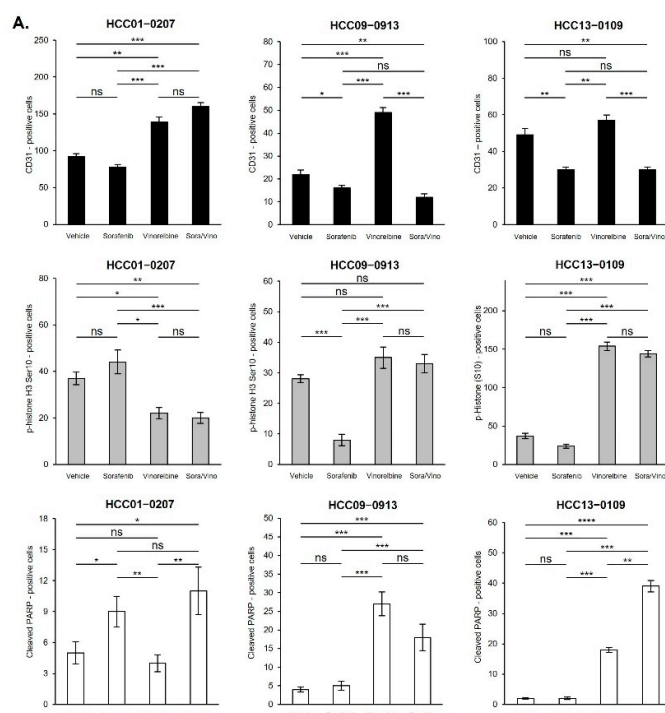

**Supplementary Figure S6A.** Quantification analysis of CD31-, p-histone H3 Ser10-, and cleaved PARP-positive cells in the HCC01-0207, HCC09-0913, and HCC13-0109 PDX models treated with the vehicle, sorafenib, vinorelbine, and Sora/Vino. Data are presented as the mean  $\pm$  SEs (\*  $p < 0.05$ ; \*\*  $p < 0.01$ ; \*\*\*  $p < 0.001$ ; ns, no significance; Student's *t*-test).

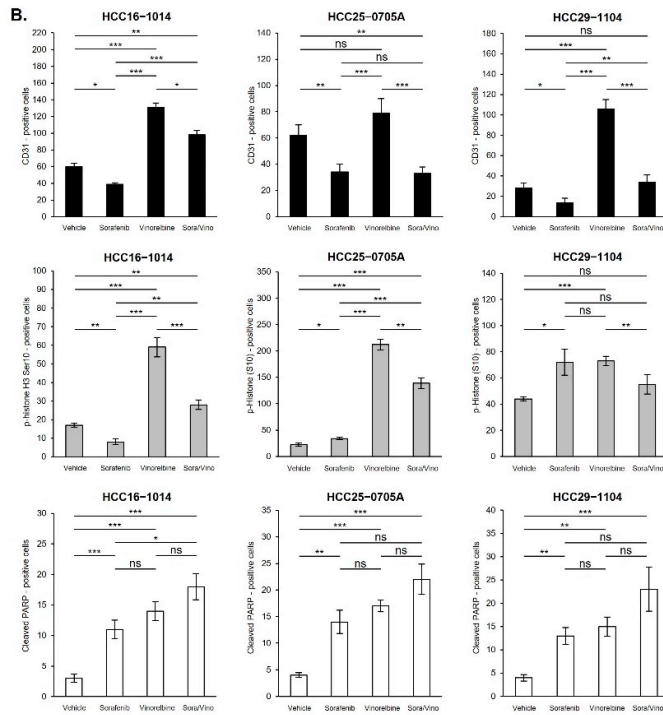

**Supplementary Figure S6B.** Quantification analysis of CD31-, p-histone H3 Ser10-, and cleaved PARP-positive cells in the HCC16-1014, HCC25-0705A, and HCC29-1104 PDX models treated with the vehicle, sorafenib, vinorelbine, and Sora/Vino. Data are presented as the mean  $\pm$  SEs (\*  $p < 0.05$ ; \*\*  $p < 0.01$ ; \*\*\*  $p < 0.001$ ; ns, no significance; Student's t-test).

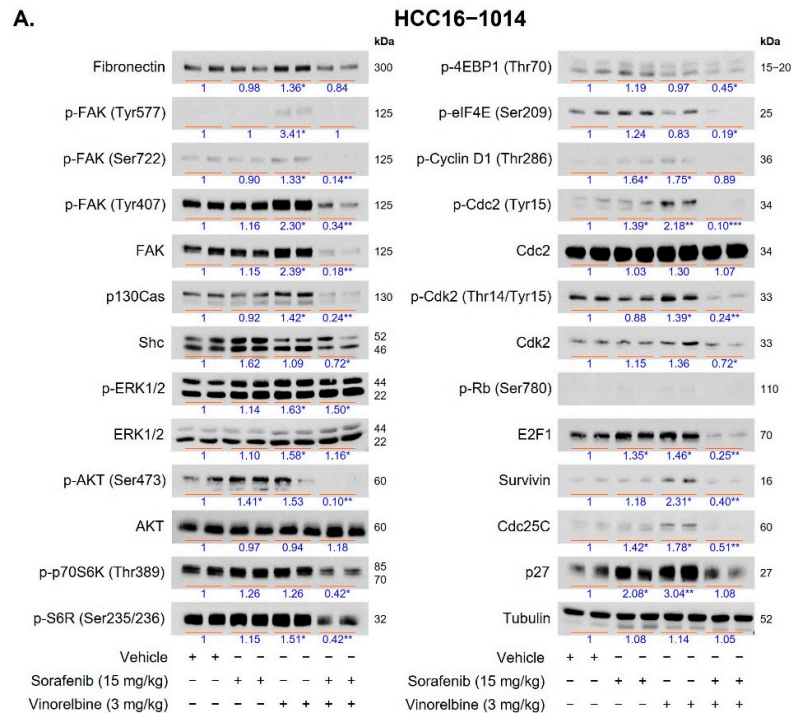

**Supplementary Figure S7A.** Sora/Vino synergistic effects in the treatment of HCC PDX models. Mice bearing HCC16-1014 tumors were treated with sorafenib, vinorelbine, or Sora/Vino following the methods described in Section 4. Tumors ( $n = 10$ /group) from each treatment group were harvested, pooled and snap frozen. Two pooled tumors from each treatment group were subjected to western blot analysis with the indicated antibodies. The total density of each corresponding protein band was quantified, normalized to tubulin (loading control), and expressed

as a fold change relative to the vehicle group. A value greater (or lesser) than 1 indicated that the expression level of the protein of interest was greater (or lower) than that in the control group. Statistical analysis was performed using ANOVA followed by Tukey's test (\*  $p < 0.05$ ; \*\*  $p < 0.01$ ; \*\*\*  $p < 0.001$ ; ns, no significance). Western blot analysis revealed that HCC16-1014 tumors treated with Sora/Vino exhibited a synergistic effect in reducing the protein levels of p-FAK (Ser722), p-FAK (Tyr407), FAK, p-Cyclin D1 (Thr286), p-Cdc2 (Tyr15), p-Cdk2 (Thr14/Tyr15), Cdk2, p-AKT (Ser473), E2F1, p130Cas, Cdc25C, p70S6K (Thr389), p-S6R (Ser235/236), and p-eIF4E (Ser209) compared to the vehicle or monotherapies.

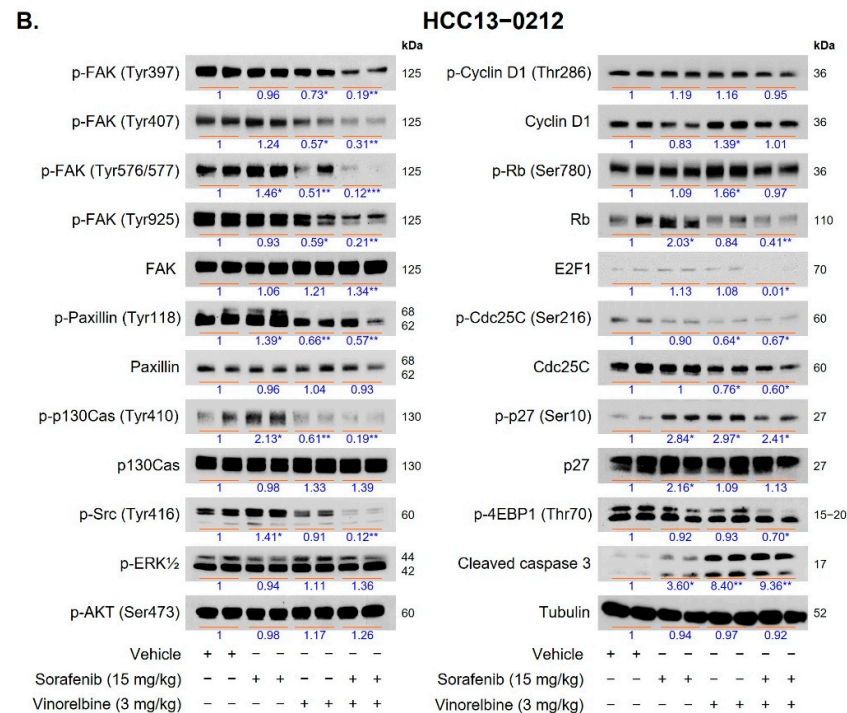

**Supplementary Figure S7B.** Sora/Vino synergistic effects in the treatment of HCC PDX models. Mice bearing HCC13-0212 tumors were treated with sorafenib, vinorelbine, or Sora/Vino following the methods described in Section 4. Tumors (n = 10/group) from each treatment group were harvested, pooled and snap frozen. Two pooled tumors from each treatment group were subjected to western blot analysis with the indicated antibodies. The total density of each corresponding protein band was quantified, normalized to tubulin (loading control), and expressed as a fold change relative to the vehicle group. A value greater (or lesser) than 1 indicated that the expression level of the protein of interest was greater (or lower) than that in the control group. Statistical analysis was performed using ANOVA followed by Tukey's test (\*  $p < 0.05$ ; \*\*  $p < 0.01$ ; \*\*\*  $p < 0.001$ ; ns, no significance). Western blot analysis revealed that HCC13-0212 tumors treated with Sora/Vino exhibited a synergistic effect in reducing the protein levels of p-FAK (Tyr397), p-FAK (Tyr407), p-FAK (Tyr576/577), p-FAK (Tyr925), Rb, p-p130Cas (Tyr410), E2F1, p-paxillin (Tyr118), p-Cdc25C (Ser216), Cdc25C, and p-Src (Tyr416) compared to the vehicle or monotherapy groups.

C.

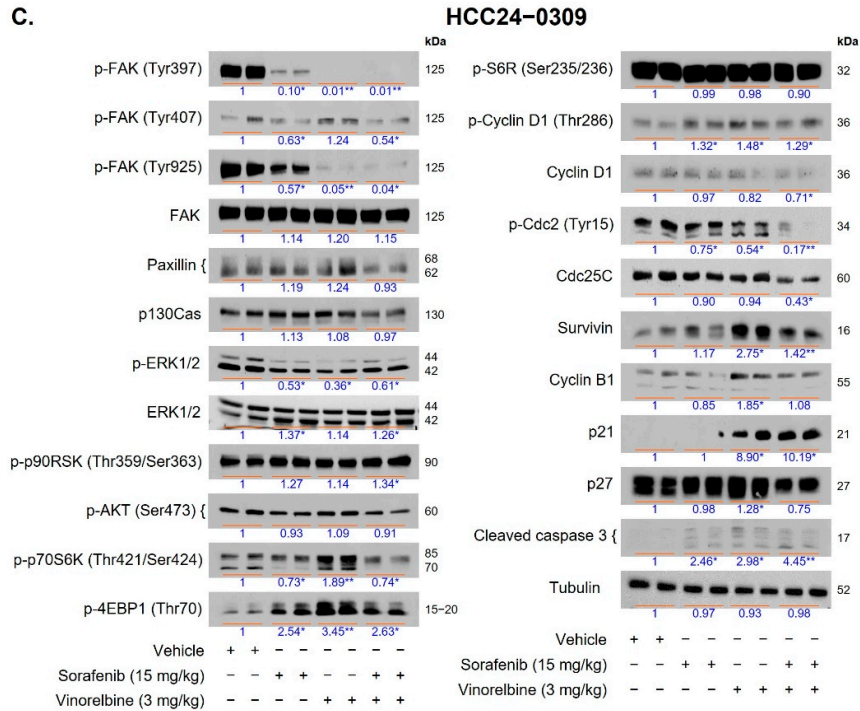

**Supplementary Figure S7C.** Sora/Vino synergistic effects in the treatment of HCC PDX models. Mice bearing HCC24-0309 tumors were treated with sorafenib, vinorelbine, or Sora/Vino following the methods described in Section 4. Tumors (n = 10/group) from each treatment group were harvested, pooled and snap frozen. Two pooled tumors from each treatment group were subjected to western blot analysis with the indicated antibodies. The total density of each corresponding protein band was quantified, normalized to tubulin (loading control), and expressed as a fold change relative to the vehicle group. A value greater (or lesser) than 1 indicated that the expression level of the protein of interest was greater (or lower) than that in the control group. Statistical analysis was performed using ANOVA followed by Tukey's test (\*  $p < 0.05$ ; \*\*  $p < 0.01$ ; \*\*\*  $p < 0.001$ ; ns, no significance). Western blot analysis revealed that HCC24-0309 tumors treated with Sora/Vino exhibited a synergistic effect in reducing the protein levels of p-FAK (Tyr397), p-FAK (Tyr925), p-Cdc2 (Tyr15), Cdc25C, and p130Cas compared to the vehicle or monotherapy groups.

D.

# HCC27-1014

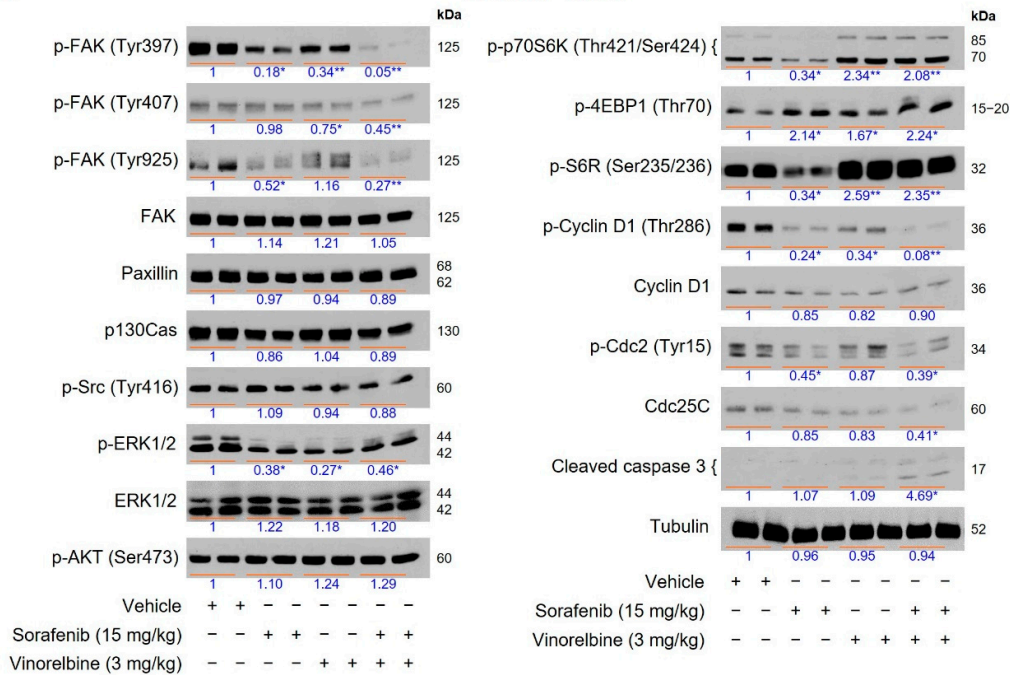

**Supplementary Figure S7D.** Sora/Vino synergistic effects in the treatment of HCC PDX models. Mice bearing HCC27-1014 tumors were treated with sorafenib, vinorelbine, or Sora/Vino following the methods described in Section 4. Tumors (n = 10/group) from each treatment group were harvested, pooled and snap frozen. Two pooled tumors from each treatment group were subjected to western blot analysis with the indicated antibodies. The total density of each corresponding protein band was quantified, normalized to tubulin (loading control), and expressed as a fold change relative to the vehicle group. A value greater (or lesser) than 1 indicated that the expression level of the protein of interest was greater (or lower) than that in the control group. Statistical analysis was performed using ANOVA followed by Tukey's test (\*  $p < 0.05$ ; \*\*  $p < 0.01$ ; \*\*\*  $p < 0.001$ ; ns, no significance). Western blot analysis revealed that HCC27-1014 tumors treated with Sora/Vino exhibited a synergistic effect in reducing the protein levels of p-FAK (Tyr397), p-FAK (Tyr407), p-FAK (Tyr925), p-Cyclin D1 (Thr286), Cyclin D1, p-Cdc2 (Tyr15), and p-ERK1/2 compared to the vehicle or monotherapy groups.

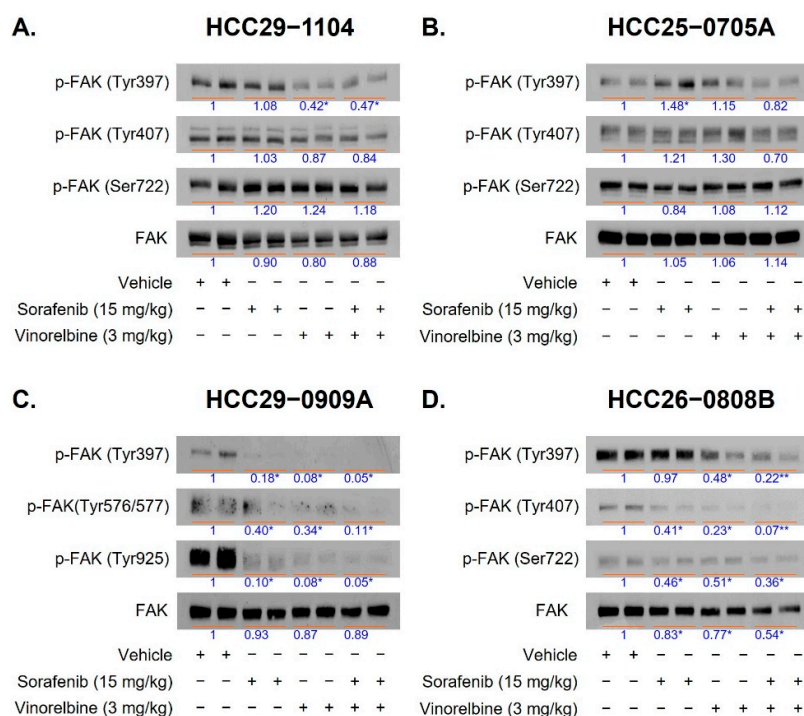

**Supplementary Figure S8.** Consistently reduced FAK phosphorylation by Sora/Vino in HCC PDX models. Mice bearing the indicated tumors were treated with sorafenib, vinorelbine, or Sora/Vino, as described in Section 4. Harvested tumors were subjected to Western blot analysis using the indicated antibodies, as described in Section 4. Treatment with Sora/Vino in (A) HCC29-1104, (B) HCC25-0705A, (C) HCC29-0909A, and (D) HCC26-0808B significantly reduced the levels of phosphorylated FAK at Tyr397, Tyr407, and Tyr925 compared to the vehicle or monotherapy groups.

**Supplementary Table S1.** Sensitivity of HCC PDX models to Sora/Vino treatment. A total of 22 HCC PDX models were treated with the vehicle, sorafenib, vinorelbine, or Sora/Vino. The T/C ratio of each treatment was calculated by comparison to the vehicle group. Tumors with T/C ratios < 0.3 were considered sensitive, those with T/C ratios between 0.3 and 0.42 were considered moderately sensitive, and those with T/C ratios > 0.42 were considered less sensitive (resistant). Approximately 86.4% (19/22) of HCC models were considered sensitive, whereas 13.6% (3/22) were considered moderately sensitive when treated with Sora/Vino.

| HCC PDX models | Treatments and T/C Ratio |                   |                    |           |                                 |
|----------------|--------------------------|-------------------|--------------------|-----------|---------------------------------|
|                | Vehicle                  | Sorafenib 15mg/kg | Vinorelbine 3mg/kg | Sora/Vino | Sorafenib vs Sora/Vino p-values |
| HCC01-0207     | 1                        | 0.532             | 0.961              | 0.4037    | 0.1195                          |
| HCC01-1215     | 1                        | 0.5776            | 0.6397             | 0.1629    | 1.418 x 10 <sup>-5</sup>        |
| HCC03-1013     | 1                        | 0.194             | 0.3338             | 0.0816    | 7.776 x 10 <sup>-4</sup>        |
| HCC05-0614     | 1                        | 0.3294            | 0.5143             | 0.0732    | 2.193 x 10 <sup>-3</sup>        |
| HCC09-0913     | 1                        | 0.4512            | 0.9035             | 0.3098    | 0.0337                          |
| HCC13-0109     | 1                        | 0.2323            | 0.1473             | 0.0204    | 1.959 x 10 <sup>-5</sup>        |
| HCC13-0212     | 1                        | 0.1592            | 0.1503             | 0.0297    | 6.844 x 10 <sup>-9</sup>        |
| HCC15-0114     | 1                        | 0.3246            | 0.6021             | 0.1506    | 5.269 x 10 <sup>-3</sup>        |
| HCC16-1014     | 1                        | 0.581             | 0.5837             | 0.3382    | 6.532 x 10 <sup>-3</sup>        |
| HCC19-0509     | 1                        | 0.386             | 0.324              | 0.0886    | 2.688 x 10 <sup>-5</sup>        |
| HCC19-0913     | 1                        | 0.2628            | 0.3253             | 0.05      | 1.224x 10 <sup>-4</sup>         |
| HCC21-0114     | 1                        | 0.343             | 0.4352             | 0.1231    | 6.418 x 10 <sup>-5</sup>        |

|             |   |        |        |        |                          |
|-------------|---|--------|--------|--------|--------------------------|
| HCC21-0208  | 1 | 0.2622 | 0.4207 | 0.1116 | 3.541 × 10 <sup>-4</sup> |
| HCC24-0309  | 1 | 0.348  | 0.487  | 0.201  | 0.0187                   |
| HCC24-0714  | 1 | 0.3097 | 0.7768 | 0.1994 | 2.885 × 10 <sup>-4</sup> |
| HCC25-0705A | 1 | 0.4395 | 0.7869 | 0.152  | 6.688 × 10 <sup>-4</sup> |
| HCC25-0914  | 1 | 0.2639 | 0.8243 | 0.1102 | 1.175 × 10 <sup>-3</sup> |
| HCC26-0808B | 1 | 0.3806 | 0.8103 | 0.1206 | 0.0106                   |
| HCC27-1014  | 1 | 0.2999 | 0.4152 | 0.1235 | 3.230 × 10 <sup>-4</sup> |
| HCC29-0714B | 1 | 0.3839 | 0.5791 | 0.1461 | 2.653 × 10 <sup>-3</sup> |
| HCC29-0909A | 1 | 0.3058 | 0.5981 | 0.1386 | 7.889 × 10 <sup>-5</sup> |
| HCC29-1104  | 1 | 0.3375 | 0.6262 | 0.1652 | 1.218 × 10 <sup>-3</sup> |

**Supplementary Table S2.** List of primary antibodies used in Western blot analysis.

| No. | Antibody             | Target Protein                                                                         | Brand                     | Cat. No.   | Host   |
|-----|----------------------|----------------------------------------------------------------------------------------|---------------------------|------------|--------|
| 1   | p-4EBP1 (Thr70)      | Phosphorylated eukaryotic translation initiation factor 4E binding protein 1 at Thr 70 | Cell Signaling Technology | #13396     | Rabbit |
| 2   | AKT                  | AKT Serine/Threonine Kinase                                                            | Cell Signaling Technology | #9272      | Rabbit |
| 3   | p-AKT (Ser473)       | Phosphorylated AKT Serine/Threonine Kinase at Ser 473                                  | Cell Signaling Technology | #9271      | Rabbit |
| 4   | Bcl-xL               | BCL2 like 1                                                                            | Cell Signaling Technology | #2764      | Rabbit |
| 5   | c-myc                | Transcriptional regulator Myc-like                                                     | Proteintech               | 10057-1-AP | Rabbit |
| 6   | p-c-myc (Ser62)      | Phosphorylated transcriptional regulator Myc-like at Ser 62                            | Cell Signaling Technology | #13748     | Rabbit |
| 7   | CDC25C               | Cell Division Cycle 25C                                                                | Cell Signaling Technology | #4688      | Rabbit |
| 8   | p-CDC25C (Ser216)    | Phosphorylated Cell Division Cycle 25C at Ser 216                                      | Cell Signaling Technology | #4901      | Rabbit |
| 9   | Cdc2                 | Cyclin Dependent Kinase 1                                                              | Santa Cruz Biotechnology  | sc-954     | Rabbit |
| 10  | p-Cdc2 (Tyr15)       | Phosphorylated Cell Dependent Kinase 1 at Tyr 15                                       | Cell Signaling Technology | #9111      | Rabbit |
| 11  | Cdk2                 | Cyclin Dependent Kinase 2                                                              | Cell Signaling Technology | #2546      | Rabbit |
| 12  | p-Cdk2 (Thr14/Tyr15) | Phosphorylated Cyclin Dependent Kinase 2 at Thr 14/Tyr 15                              | Santa Cruz Biotechnology  | sc-28435-R | Rabbit |
| 13  | Cleaved Caspase 3    | Activated caspase-3 cleaved at Asp 175                                                 | Cell Signaling Technology | #9661      | Rabbit |
| 14  | Cyclin A2            | Cyclin A2                                                                              | Cell Signaling Technology | #4656      | Mouse  |
| 15  | Cyclin B1            | Cyclin B1                                                                              | Cell Signaling Technology | #4138      | Rabbit |
| 16  | Cyclin D1            | Cyclin D1                                                                              | Cell Signaling Technology | #2978      | Rabbit |
| 17  | p-Cyclin D1 (Thr286) | Phosphorylated Cyclin D1 at Thr 286                                                    | Cell Signaling Technology | #3300      | Rabbit |
| 18  | E2F1                 | E2F transcription factor 1                                                             | Santa Cruz Biotechnology  | sc-251     | Mouse  |
| 19  | E-cadherin           | Cadherin 1,                                                                            | Proteintech               | 20874-1-AP | Rabbit |
| 20  | eIF4E                | Eukaryotic translation initiation factor 4E                                            | Cell Signaling Technology | #9742      | Rabbit |
| 21  | p-eIF4E (Ser209)     | Phosphorylated Eukaryotic translation initiation factor 4E at Ser 209                  | Cell Signaling Technology | #9741      | Rabbit |
| 22  | ERK1/2               | p44 and p42 MAP Kinase (Erk1 and Erk2)                                                 | Santa Cruz Biotechnology  | sc-94      | Rabbit |
| 23  | p-ERK1/2             | Phosphorylated p44 and p42 MAP Kinase (Erk1 and Erk2) at Thr202 and Tyr204             | Cell Signaling Technology | #4370      | Rabbit |
| 24  | FAK                  | Focal adhesion kinase                                                                  | Cell Signaling Technology | #13009     | Rabbit |
| 25  | p-FAK (Tyr397)       | Phosphorylated Focal adhesion kinase at Tyr 397                                        | Cell Signaling Technology | #8556      | Rabbit |
| 26  | p-FAK (Tyr407)       | Phosphorylated Focal adhesion kinase at Tyr 407                                        | Millipore                 | 07-829     | Rabbit |

|    |                             |                                                                                 |                           |          |        |
|----|-----------------------------|---------------------------------------------------------------------------------|---------------------------|----------|--------|
| 27 | p-FAK<br>(Tyr576/577)       | Phosphorylated Focal adhesion kinase at Tyr 576/577                             | Cell Signaling Technology | #3281    | Rabbit |
| 28 | p-FAK (Tyr925)              | Phosphorylated Focal adhesion kinase at Tyr 925                                 | Cell Signaling Technology | #3284    | Rabbit |
| 29 | Fibronectin                 | Fibronectin 1                                                                   | CalBiochem                | CP13L    | Mouse  |
| 30 | p-mTOR (Ser2448)            | Phosphorylated mammalian target of rapamycin (mTOR) kinase at Ser 2448          | Cell Signaling Technology | #5536    | Rabbit |
| 31 | p130Cas                     | p130 Crk-associated substrate (Cas)                                             | Santa Cruz Biotechnology  | sc-20029 | Mouse  |
| 32 | p-p130Cas (Tyr410)          | Phosphorylated p130 Crk-associated substrate (Cas) at Tyr 410                   | Cell Signaling Technology | #4011    | Rabbit |
| 33 | P21                         | p21 Waf1/Cip1 family of cyclin dependent kinase inhibitor 1A                    | Cell Signaling Technology | #2947    | Rabbit |
| 34 | P27                         | Cip/Kip family of cyclin dependent kinase inhibitor 1B                          | Cell Signaling Technology | #3686    | Rabbit |
| 35 | p-p27 (Ser10)               | Phosphorylated Cip/Kip family of cyclin dependent kinase inhibitor 1B at Ser 10 | Abcam                     | ab62364  | Rabbit |
| 36 | Paxillin                    | Paxillin                                                                        | Cell Signaling Technology | #12065   | Rabbit |
| 37 | p-Paxillin (Tyr118)         | Phosphorylated paxillin at Tyr 118                                              | Cell Signaling Technology | #2541    | Rabbit |
| 38 | p-p70S6k (Thr389)           | Phosphorylated ribosomal protein S6 kinase B1 at Thr 389                        | Cell Signaling Technology | #9205    | Rabbit |
| 39 | p-p70S6k<br>(Thr421/Ser424) | Phosphorylated ribosomal protein S6 kinase B1 at Thr 421/Ser 424                | Cell Signaling Technology | #9204    | Rabbit |
| 40 | p-p90RSK<br>(Thr359/Ser363) | Phosphorylated ribosomal protein S6 kinase A1/A2 at Thr 359/Ser 363             | Cell Signaling Technology | #9344    | Rabbit |
| 41 | Rb                          | Retinoblastoma (Rb) transcriptional corepressor 1                               | Cell Signaling Technology | #9313    | Rabbit |
| 42 | p-Rb (Ser780)               | Phosphorylated Rb at Ser 780                                                    | Cell Signaling Technology | #8180    | Rabbit |
| 43 | p-S6R (Ser235/236)          | Phosphorylated ribosomal protein S6 at Ser 235/236                              | Cell Signaling Technology | #4858    | Rabbit |
| 44 | Shc                         | SHC-transforming protein 1                                                      | Cell Signaling Technology | #2432    | Rabbit |
| 45 | p-Shc (Tyr239/240)          | Phosphorylated SHC-transforming protein 1 at Tyr239/240                         | Cell Signaling Technology | #2434    | Rabbit |
| 46 | p-Src (Tyr416)              | Phosphorylated Src family tyrosine kinase at Tyr 416                            | Cell Signaling Technology | #2101    | Rabbit |
| 47 | Survivin                    | Survivin                                                                        | Cell Signaling Technology | #2808    | Rabbit |
